# Supplementary material
Source: Springer Nature journal article supplement (https://www.springermedizin.de/resource/supplementary/12879_2009_1108_MOESM3_ESM.pdf/9441868)

**WAVE ONE**

**WAVE TWO**

**WAVE THREE**

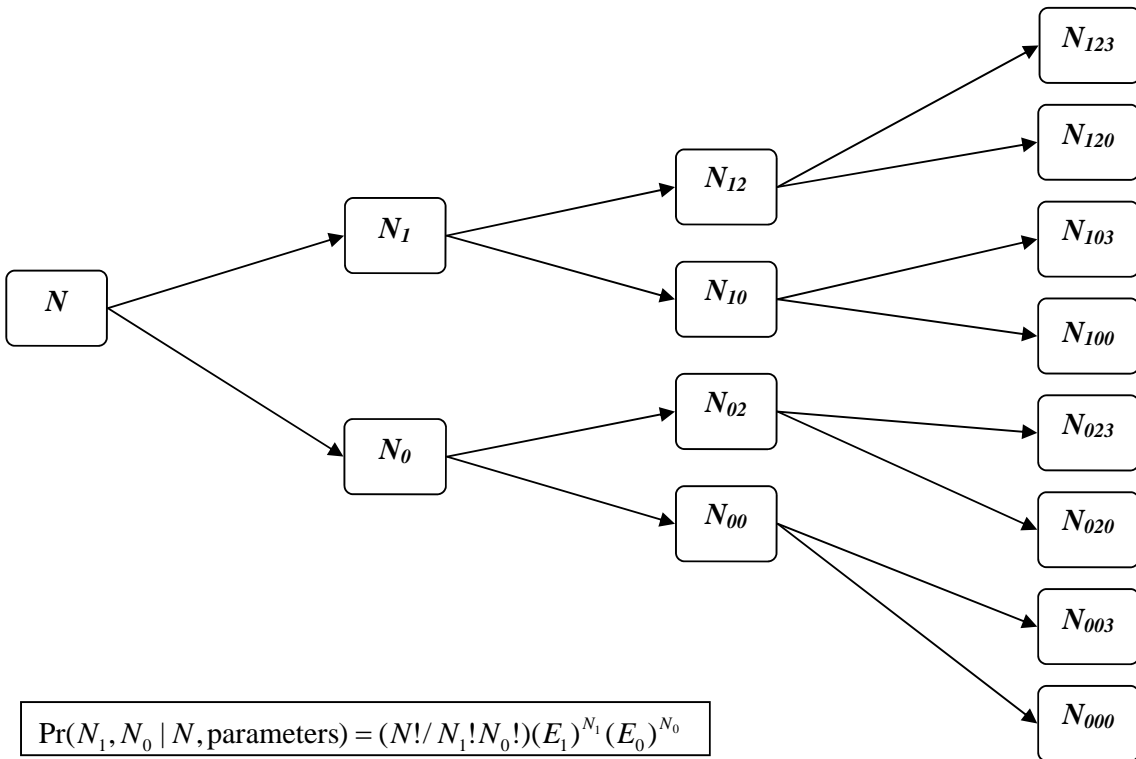

$$\Pr(N_1, N_0 | N, \text{parameters}) = (N! / N_1! N_0!) (E_1)^{N_1} (E_0)^{N_0}$$

Supplement: MOESM3 [file 9441868]
